# Supplementary material for: Effect of aerosol subgrid variability on aerosol optical depth and cloud condensation nuclei: implications for global aerosol modelling
Source: Copernicus journal article supplement (doi:10.5194/acp-16-13619-2016), 2016-11-03
Supplement: Supplementary file [file acp-16-13619-2016-supplement-title-page.pdf › acp-16-13619-2016-supplement-title-page.pdf]

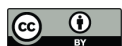

## *Supplement of*

# **Effect of aerosol subgrid variability on aerosol optical depth and cloud condensation nuclei: implications for global aerosol modelling**

**Natalie Weigum et al.**

*Correspondence to:* Philip Stier ([philip.stier@physics.ox.ac.uk](mailto:philip.stier@physics.ox.ac.uk))

- [acp-16-13619-2016-supplement-title-page.pdf](#)
- [module\\_coarse\\_average.F](#)

The copyright of individual parts of the supplement might differ from the CC-BY 3.0 licence.
